# Supplementary material
Source: HighWire-hosted journal article supplement (http://cmajopen.ca/highwire/filestream/81227/field_highwire_adjunct_files/0/2018-0064-1-at.pdf)
Supplement: 2018-0064-1-at.pdf [file 2018-0064-1-at.pdf]

**Appendix 1 (as supplied by the authors): Urinary Tract Infection Program recommended strategies and guide to the classification of adherence.**

| Strategy                                                                            | Definition                                                                                                                                                                                        | Target audience / details on delivery                                                                                                                                                                                                                                                                                                                                                                                                                          | Classification of Adherent                                                                                                                                                                                                                                                                                                                           |
|-------------------------------------------------------------------------------------|---------------------------------------------------------------------------------------------------------------------------------------------------------------------------------------------------|----------------------------------------------------------------------------------------------------------------------------------------------------------------------------------------------------------------------------------------------------------------------------------------------------------------------------------------------------------------------------------------------------------------------------------------------------------------|------------------------------------------------------------------------------------------------------------------------------------------------------------------------------------------------------------------------------------------------------------------------------------------------------------------------------------------------------|
| <b>1. Reviewing and revising organizational policies and procedures</b>             | Align policies and procedures with the five practice recommendations.                                                                                                                             | <b>Target audience:</b> Staff involved in the assessment and management of UTIs<br><b>When / how often:</b> At program initiation<br><b>Resources:</b> Guidance and sample policy for the assessment and management of UTIs                                                                                                                                                                                                                                    | Key informant reports that organizational policies and procedures were reviewed; OR if policies and procedures were already aligned with recommended practices, project team to confirm alignment; OR if needing update, evidence that organization has started the process of revising policies and procedures to align with recommended practices. |
| <b>2. Selecting and empowering champions</b>                                        | Selecting staff members who will dedicate themselves to supporting and facilitating practice change implementation. Helping to overcome resistance and engaging other staff to strengthen buy-in. | <b>Target audience:</b> Administrative staff (e.g., director of care) and staff involved in the assessment and management of UTIs<br><b>When / how often:</b> Ongoing<br><b>Resources:</b> Assessment algorithm for UTI in medically stable non-catheterized residents, fact sheets                                                                                                                                                                            | Key informant identifies name(s) of implementation champion(s); AND documents examples of responsibilities of the implementation champion; AND identifies at least one example of how champions helped facilitate the change process.                                                                                                                |
| <b>3. Involving local opinion leaders</b>                                           | Individuals who are perceived to have influence within the facility (e.g., physicians, nurse practitioners). Involving leaders in supporting practice change.                                     | <b>Target audience:</b> Administrative staff and frontline staff<br><b>When / how often:</b> Ongoing<br><b>Resources:</b> Local opinion leaders have access to a range of program resources (e.g., Assessment algorithm for UTIs in medically stable non-catheterized residents, fact sheets, and Frequently Asked Questions resource).                                                                                                                        | Key informant identifies name(s) of local opinion leader; AND documents at least one example of how the local opinion leader was involved; AND at least one example of how designated local opinion leader helped facilitate the change process.                                                                                                     |
| <b>4. Carrying out local consensus processes</b>                                    | Identifying opportunities (e.g., meetings, events) to discuss the problem and practice changes with staff to ensure agreement.                                                                    | <b>Target audience:</b> Administrative staff and staff providing care to residents in the assessment and management of UTIs<br><b>When / how often:</b> Ad hoc (e.g., aligned with existing staff meetings)<br><b>Resources:</b> Program educational resources (e.g., assessment algorithm for UTIs in medically stable non-catheterized residents, fact sheets, and Frequently Asked Questions resource) can be used to support consensus processes.          | Key informant provides one example of how local consensus processes were addressed during key informant interviews.                                                                                                                                                                                                                                  |
| <b>5. Deliver classroom education to staff</b>                                      | Delivering education about the issues of treating ASB and desired practice changes.                                                                                                               | <b>Target audience:</b> Education would serve front-line staff (e.g., personal support workers, nursing staff);<br><b>When / how often:</b> Delivered once at program initiation<br><b>Resources:</b> LTCH staff deliver their own education with resource support (i.e., assessment algorithm for UTIs in medically stable non-catheterized residents, fact sheets, literature summary resources, Frequency Asked Questions resource, and PowerPoint slides). | Implementation planning team selects classroom education as a change strategy; AND key informant reports when classroom education was scheduled and executed.                                                                                                                                                                                        |
| <b>6. Provide information and education to residents and families</b>               | Distributing resources and providing education to families and residents (e.g., family council).                                                                                                  | <b>Target audience:</b> LTCH residents and families<br><b>When / how often:</b> Includes formal sessions on an ad-hoc basis (aligned with existing family council meetings) and as opportunities arise to educate and share resources with families.<br><b>Applicable PHO resources:</b> Frequently Asked Questions for residents and families, resident and family communication form, and communication for family newsletter.                               | Implementation planning team selects providing information and education to residents and families' as a strategy; AND key informant provides at least one example where information or education was formally distributed to families and residents.                                                                                                |
| <b>7. Identify and support coaches to reinforce key practices and support staff</b> | Selecting front-line staff to provide one-on-one education, feedback and support to peers.                                                                                                        | <b>Target audience:</b> All front-line staff within the LTCH<br><b>When / how often:</b> Ongoing<br><b>Resources:</b> Coaching for beliefs and consequences resource, assessment algorithm for UTIs in medically stable non-catheterized residents, fact sheets, and Frequently Asked Questions resource                                                                                                                                                       | Implementation planning team selects coaches as one of the change strategies; AND clearly identifies who within the organization will take on the role AND able to provide example of how coaches have been supporting other staff adhere to the practice changes.                                                                                   |
| <b>8. Integrate process surveillance and</b>                                        | A process that involves documenting resident symptoms,                                                                                                                                            | <b>Target audience:</b> Staff providing care to residents in the assessment and management of UTIs                                                                                                                                                                                                                                                                                                                                                             | Implementation planning team selects process surveillance as one of the change strategies; AND                                                                                                                                                                                                                                                       |

|                                                                                                      |                                                                                                                                                                                                                   |                                                                                                                                                                                                                                                                                                                                                                                                                                                                     |                                                                                                                                                                                                                                                                                                                                                    |
|------------------------------------------------------------------------------------------------------|-------------------------------------------------------------------------------------------------------------------------------------------------------------------------------------------------------------------|---------------------------------------------------------------------------------------------------------------------------------------------------------------------------------------------------------------------------------------------------------------------------------------------------------------------------------------------------------------------------------------------------------------------------------------------------------------------|----------------------------------------------------------------------------------------------------------------------------------------------------------------------------------------------------------------------------------------------------------------------------------------------------------------------------------------------------|
| <p><b>provide regular feedback to staff</b></p>                                                      | <p>whether a urine specimen was collected, and whether antibiotics were prescribed; reviewing the data for alignment with practice changes; and providing feedback to staff on opportunities for improvement.</p> | <p><b>When / how often:</b> Monitoring practice and providing feedback should be done regularly during program initiation. Improvements to overall documentation of symptoms and communication is an ongoing process.<br/><b>Applicable PHO resources:</b> Process surveillance form</p>                                                                                                                                                                            | <p>evidence that process surveillance form was used more than once; AND key informant(s) able to provide examples of how feedback has been provided to staff based on process surveillance form.</p>                                                                                                                                               |
| <p><b>9. Distribute and post educational resources as reminders to staff about key practices</b></p> | <p>Redistribution and posting of program resources (e.g., “when to collect a urine specimens” fact sheet) to remind staff about practice changes.</p>                                                             | <p><b>Target audience:</b> Staff providing care to residents in the assessment and management of UTIs<br/><b>When / how often:</b> Ad-hoc when reminders needed.<br/><b>Applicable PHO resources:</b> A number of PHO program resources could be used as reminders to support practice change (e.g., “when to collect a urine specimen”, assessment algorithm for UTIs in medically stable non-catheterized residents, Frequently Asked Questions, fact sheets)</p> | <p>Implementation planning team selects distribution of educational materials as one of the change strategies; AND key informant able to provide example of what educational resources have been shared with staff; AND able to provide at least one example of how educational materials have been used to remind staff about best practices.</p> |
